# Supplementary material
Source: MDPI journal article supplement (https://www.mdpi.com/2304-6740/12/3/86)
Supplement: s1 [file s1]

# Cellular Uptake and Phototoxicity Optimization of Arene Ruthenium Porphyrin Derivatives

Zeinab Janbeih<sup>1</sup>, Manuel Gallardo-Villagr  n<sup>2,3</sup>, Bruno Therrien<sup>3</sup>, Mona Diab-Assaf<sup>4</sup>, Bertrand Liagre<sup>2\*</sup>, Ludmil Benov<sup>1</sup>

<sup>1</sup> Biochemistry Department, Faculty of Medicine, Kuwait University, Kuwait; [zeinab.janbeih@etu.unilim.fr](mailto:zeinab.janbeih@etu.unilim.fr) (Z.J.); [ludmil.benov@ku.edu.kw](mailto:ludmil.benov@ku.edu.kw) (L.B.)

<sup>2</sup> Univ. Limoges, LABCiS, UR 22722, Facult   de Pharmacie, F-87000 Limoges, France; [villagran@outlook.com](mailto:villagran@outlook.com) (M.G.-V.)

<sup>3</sup> Institut de Chimie, Universit   de Neuch  tel, Avenue de Bellevaux 51, CH-2000 Neuch  tel, Switzerland; [bruno.therrien@unine.ch](mailto:bruno.therrien@unine.ch) (B.T.)

<sup>4</sup> Doctoral School of Sciences and Technology, Lebanese University, Hadath, Beirut 21219, Lebanon; [mdiabassaf@ul.edu.lb](mailto:mdiabassaf@ul.edu.lb) (M.D.-A.)

\* Correspondence: [bertrand.liagre@unilim.fr](mailto:bertrand.liagre@unilim.fr) (B.L.)

## Supporting information

**Table S1.** UV-vis maximum absorption and molar extinction coefficient [ $\lambda$  ( $\times 10^{-3} \text{M}^{-1} \text{cm}^{-1}$ )] determined in ethanol. Tested compounds were dissolved in DMSO at concentration of 1000  $\mu\text{M}$  and stock solutions were diluted in ethanol. Concentrations of 10  $\mu\text{M}$ , 5  $\mu\text{M}$ , 2.5  $\mu\text{M}$ , and 1  $\mu\text{M}$  were used for spectral analysis.

| Compounds            | Soret band | Q band I  | Q band II | Q band III | $\epsilon$ ( $\lambda=420$ nm) |
|----------------------|------------|-----------|-----------|------------|--------------------------------|
| Ru <sub>4</sub> a    | 414.50 nm  | 510.00 nm | -         | 590.00 nm  | 25.942                         |
| Ru <sub>4</sub> b    | 415.00 nm  | 510.50 nm | 542.00 nm | 589.00 nm  | 87.178                         |
| Ru <sub>2</sub> a    | 414.00 nm  | 515.00 nm | 545.00 nm | 589.00 nm  | 232.35                         |
| Ru <sub>2</sub> b    | 414.50 nm  | 512.00 nm | 545.00 nm | 589.00 nm  | 361.075                        |
| Zn-Ru <sub>4</sub> a | 424.50 nm  | 519.00 nm | 558.50 nm | 599.50 nm  | 231.800                        |
| Zn-Ru <sub>4</sub> b | 426.00 nm  | 519.00 nm | 557.50 nm | 598.00 nm  | 427.500                        |
| Zn-Ru <sub>2</sub> a | 425.50 nm  | 519.50 nm | 557.00 nm | 600.00 nm  | 475.300                        |
| Zn-Ru <sub>2</sub> b | 425.50 nm  | 519.50 nm | 557.00 nm | 600.50 nm  | 516.400                        |

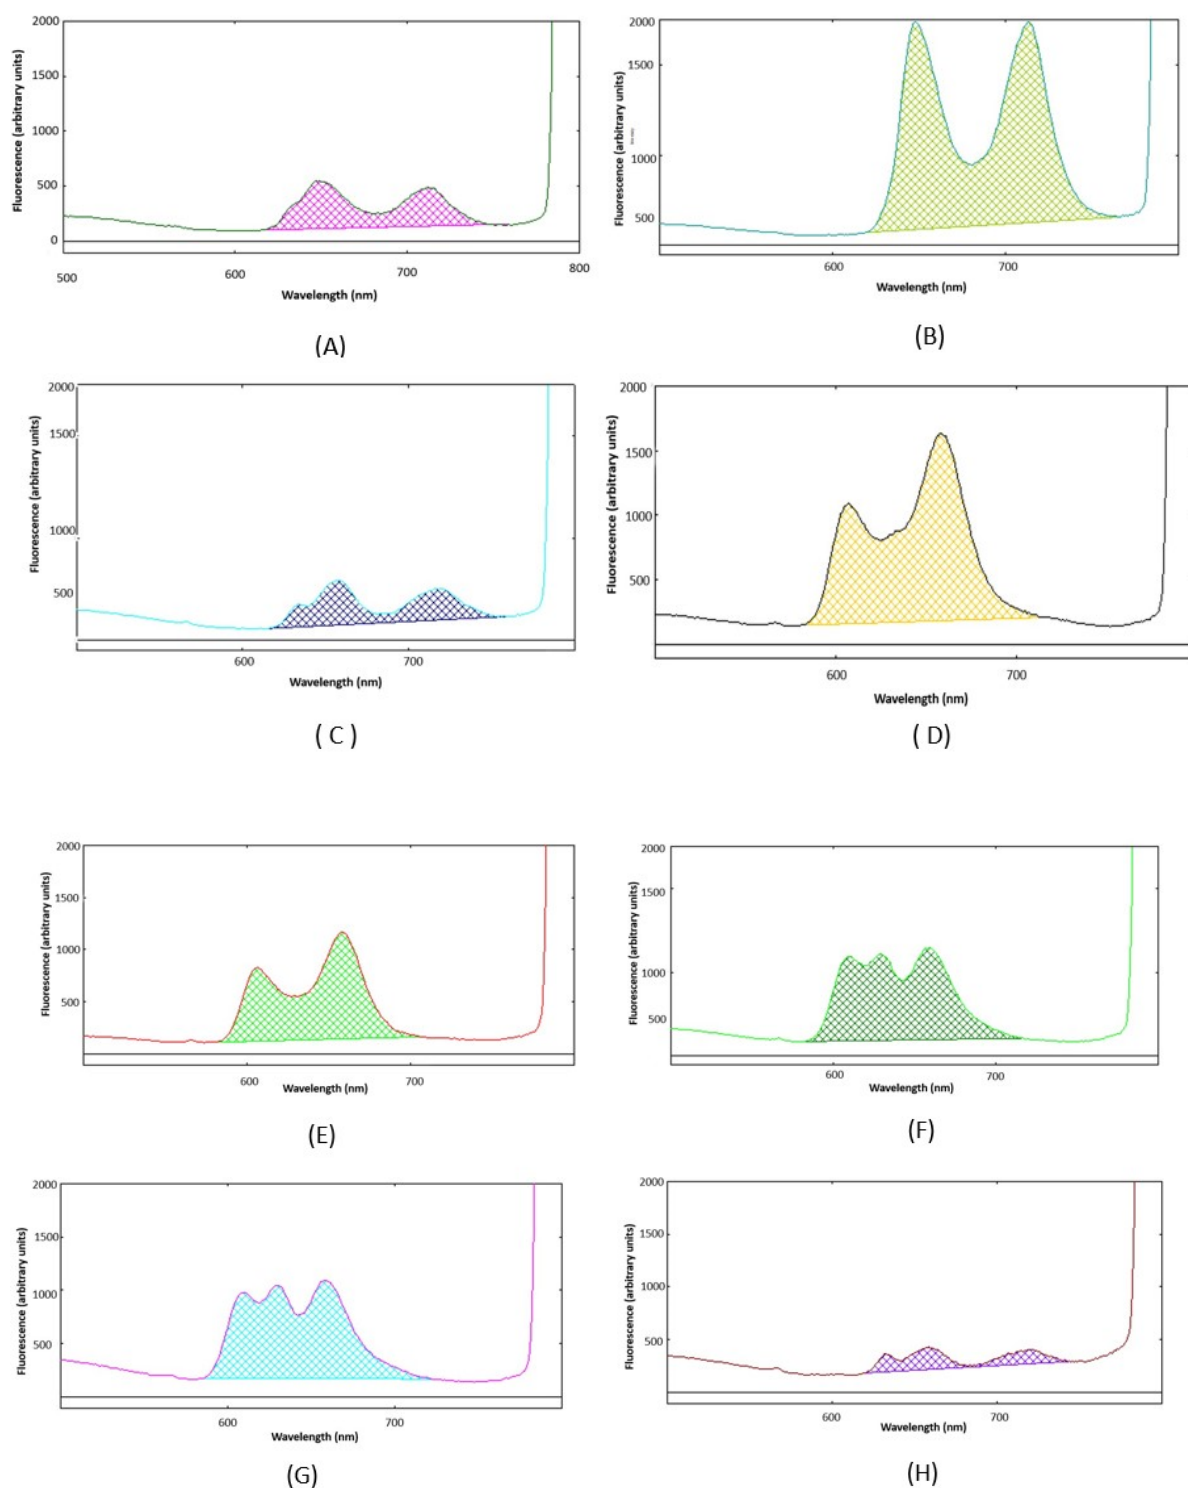

**Fig S1.** Emission spectra of solubilized cells incubated with arene ruthenium porphyrins at 5  $\mu\text{M}$  determined by spectrofluorometry to determine the cellular uptake of PSs. (A) **Ru4a**, (B) **Ru4b**, (C) **Ru2a**, (D) **Ru2b**, (E) **Zn-Ru4a**, (F) **Zn-Ru4a**, (G) **Zn-Ru4b**, (H) **Zn-Ru2b**.

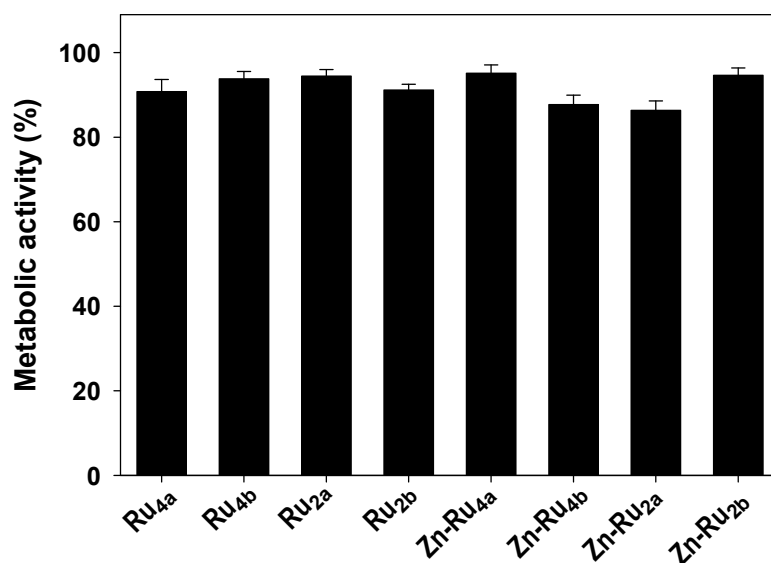

**Fig S2. Toxicity in the dark.** Cells were preincubated with 5  $\mu$ M of PSs for 24h in the dark and were kept 30 min wrapped in aluminum foil on the illumination platform. Metabolic activity was determined by the MTT assay and presented as a percentage of MTT reduction to formazan, compared to controls. Mean of three independent experiments  $\pm$  S.D. is shown.

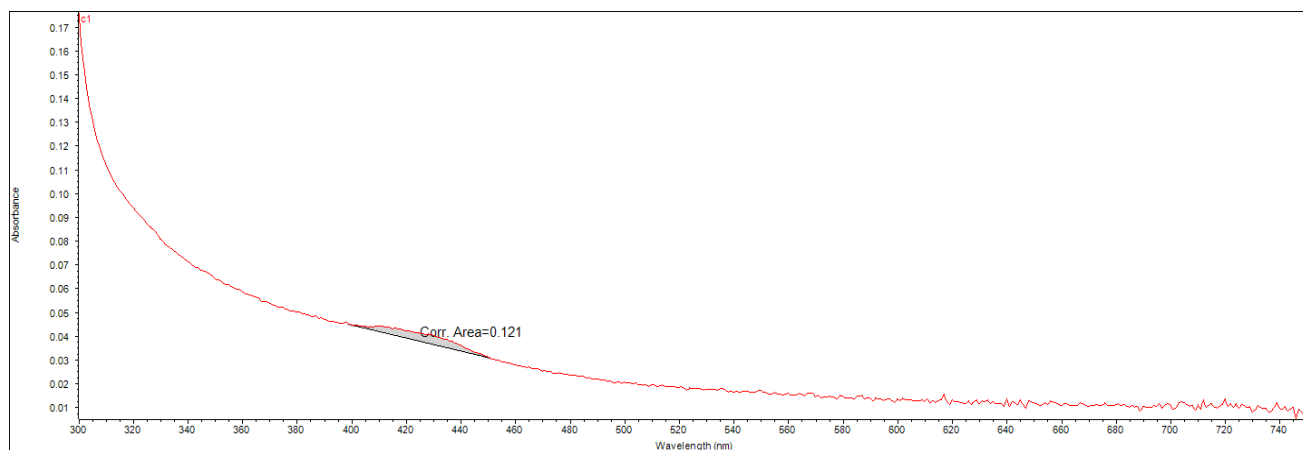

(A)

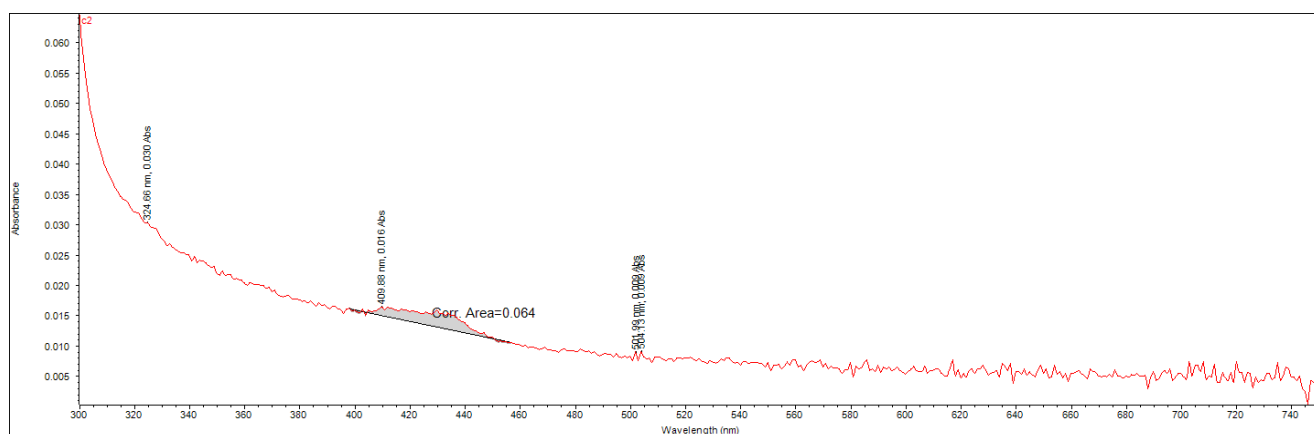

(B)

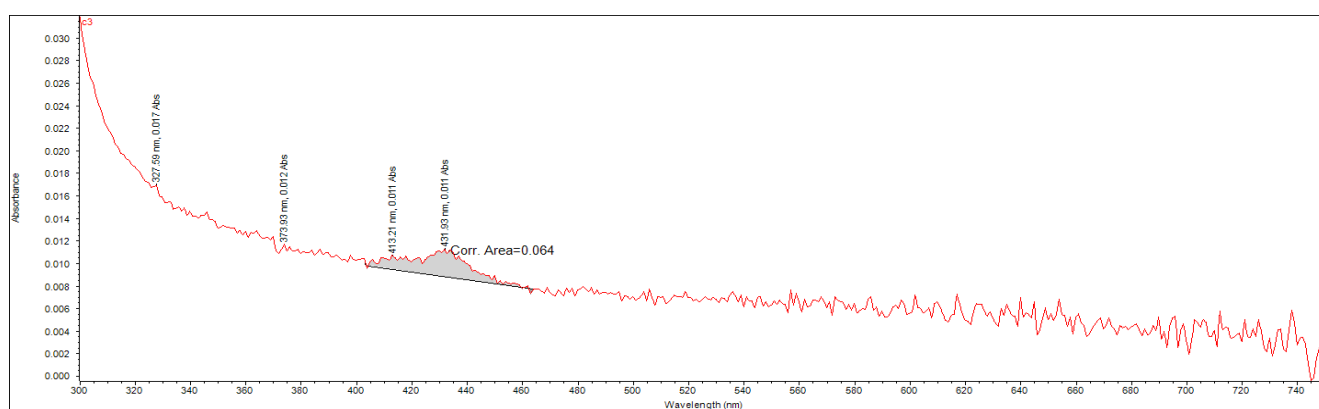

(C)

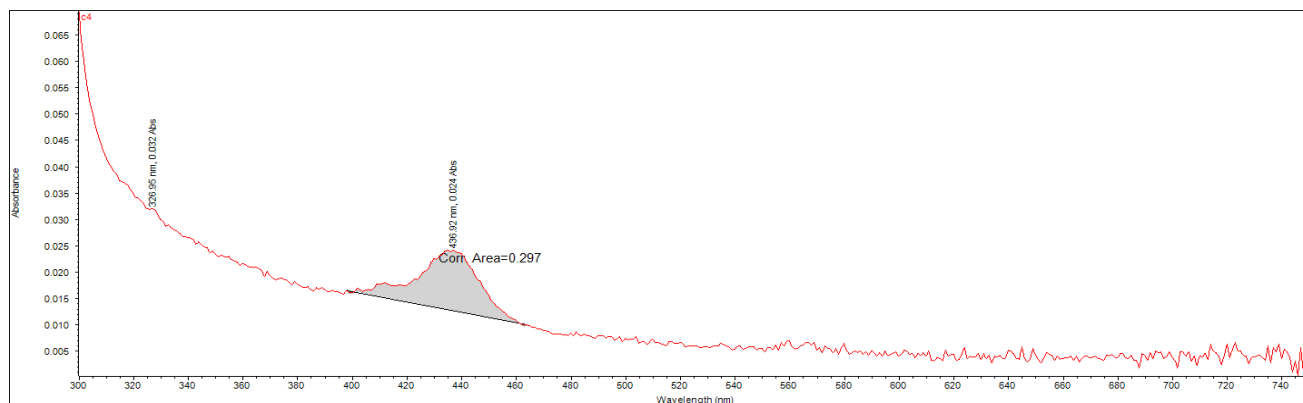

(D)

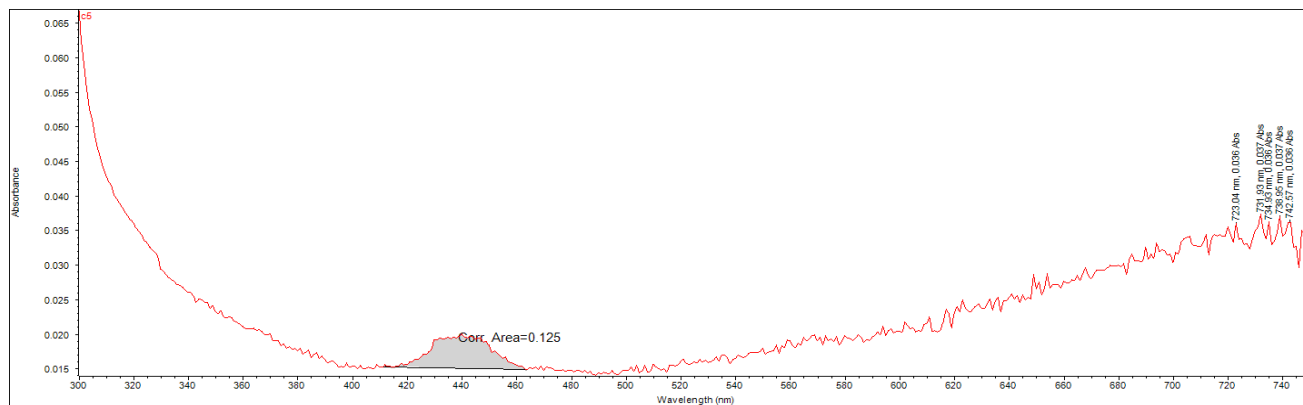

(E)

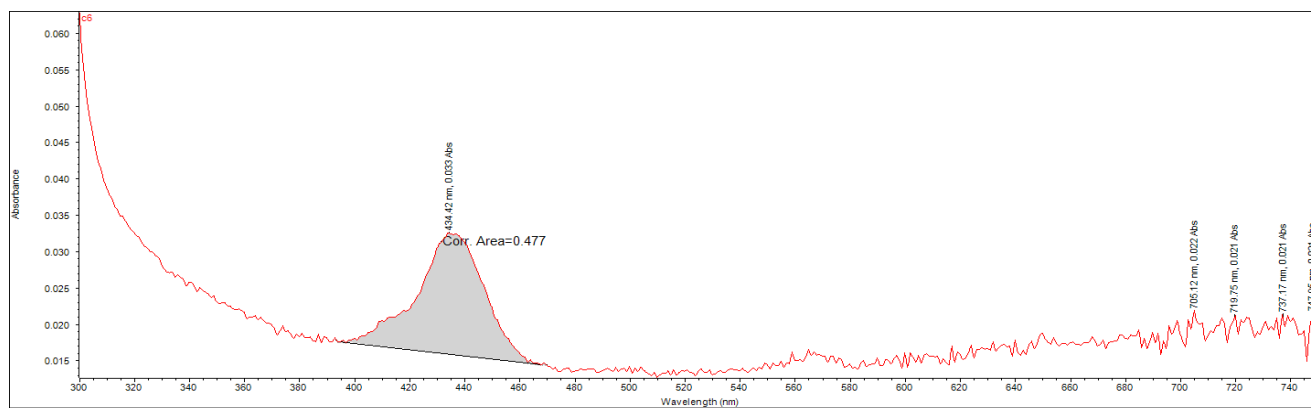

(F)

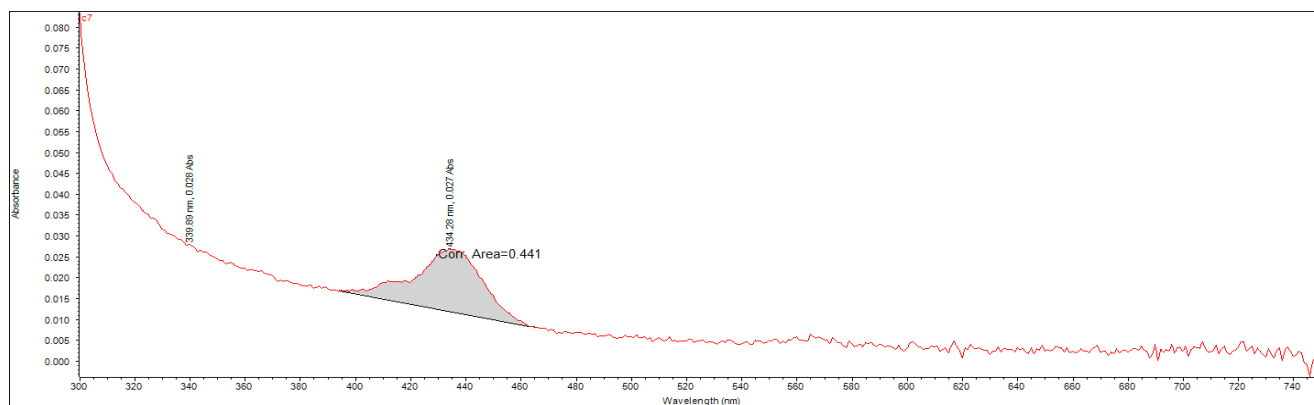

(G)

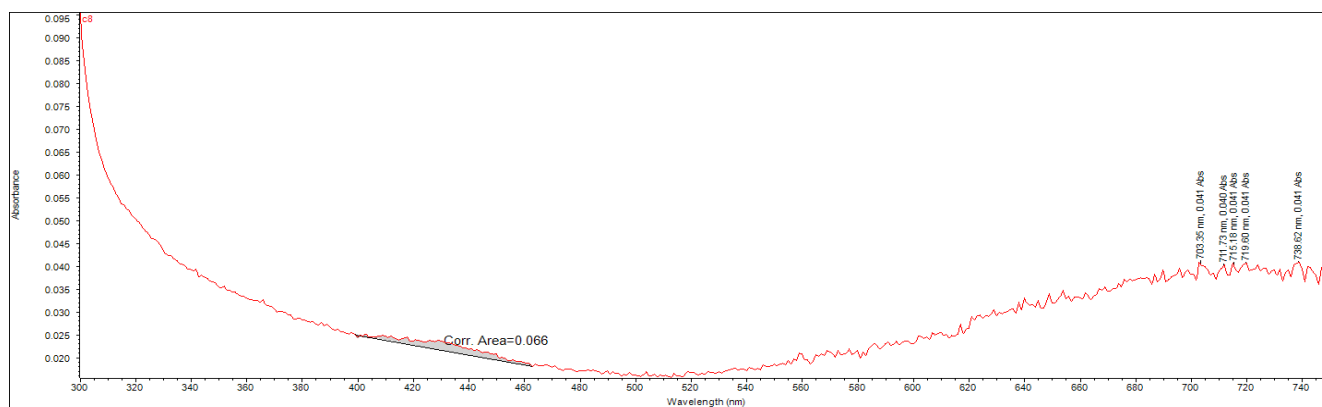

(H)

**Fig S3.** Absorbance spectra of solubilized cells incubated with arene ruthenium porphyrins for 24 h at 5  $\mu$ M. The area under the peak at the Soret band corresponds to the amount of compound taken up by the cells. (A) **Ru<sub>4a</sub>**, (B) **Ru<sub>4b</sub>**, (C) **Ru<sub>2a</sub>**, (D) **Ru<sub>2b</sub>**, (E) **Zn-Ru<sub>4a</sub>**, (F) **Zn-Ru<sub>4a</sub>**, (G) **Zn-Ru<sub>4b</sub>**, (H) **Zn-Ru<sub>2b</sub>**.

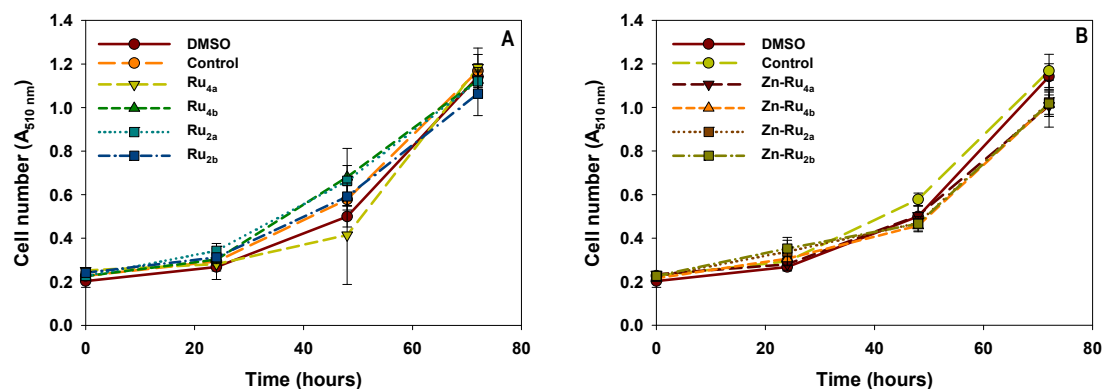

**Fig S4. Effect arene ruthenium porphyrins on cell proliferation.** Cell cultures were preincubated with 5  $\mu$ M PSs for 24 h, kept in the dark, and SRB assay was then performed. **Panel A**, Zn-free Ru-porphyrins; **Panel B**, Zn-Ru derivatives. Results are presented as OD<sub>510 nm</sub> corresponding to the number of adhered viable cells. Data are expressed as mean  $\pm$  S.D. of three independent experiments.

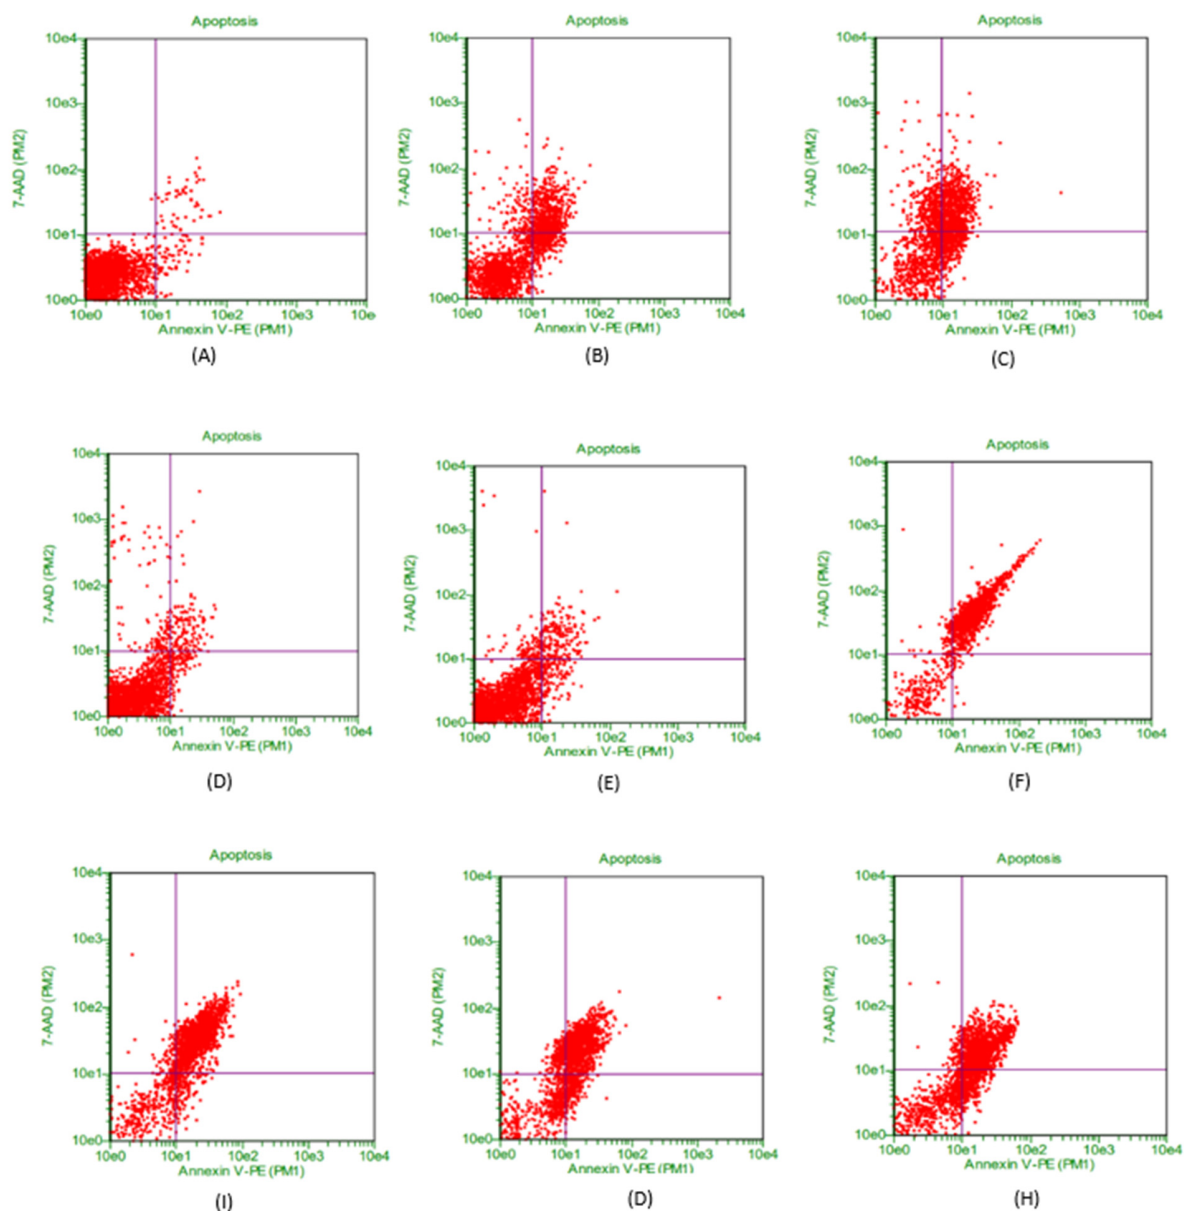

**Fig S5. Flow cytometry analysis of illuminated cells.** Colo205 cells were preincubated with 5  $\mu$ M of the PSs for 24 h and then illuminated for 30 min. The readings were taken after 24 h. **Control** (A), **Ru<sub>4a</sub>** (B), **Ru<sub>4b</sub>** (C), **Ru<sub>2a</sub>** (D), **Ru<sub>2b</sub>** (E), **Zn-Ru<sub>4a</sub>** (F), **Zn-Ru<sub>4b</sub>** (G), **Zn-Ru<sub>2a</sub>** (H), **Zn-Ru<sub>2b</sub>** (I). The lower left quadrant represents viable cells, the lower right quadrant represents early apoptotic cells, the upper right quadrant represents late apoptotic cells, and the upper left quadrant represents necrotic cells. Results of one representative experiment are shown.



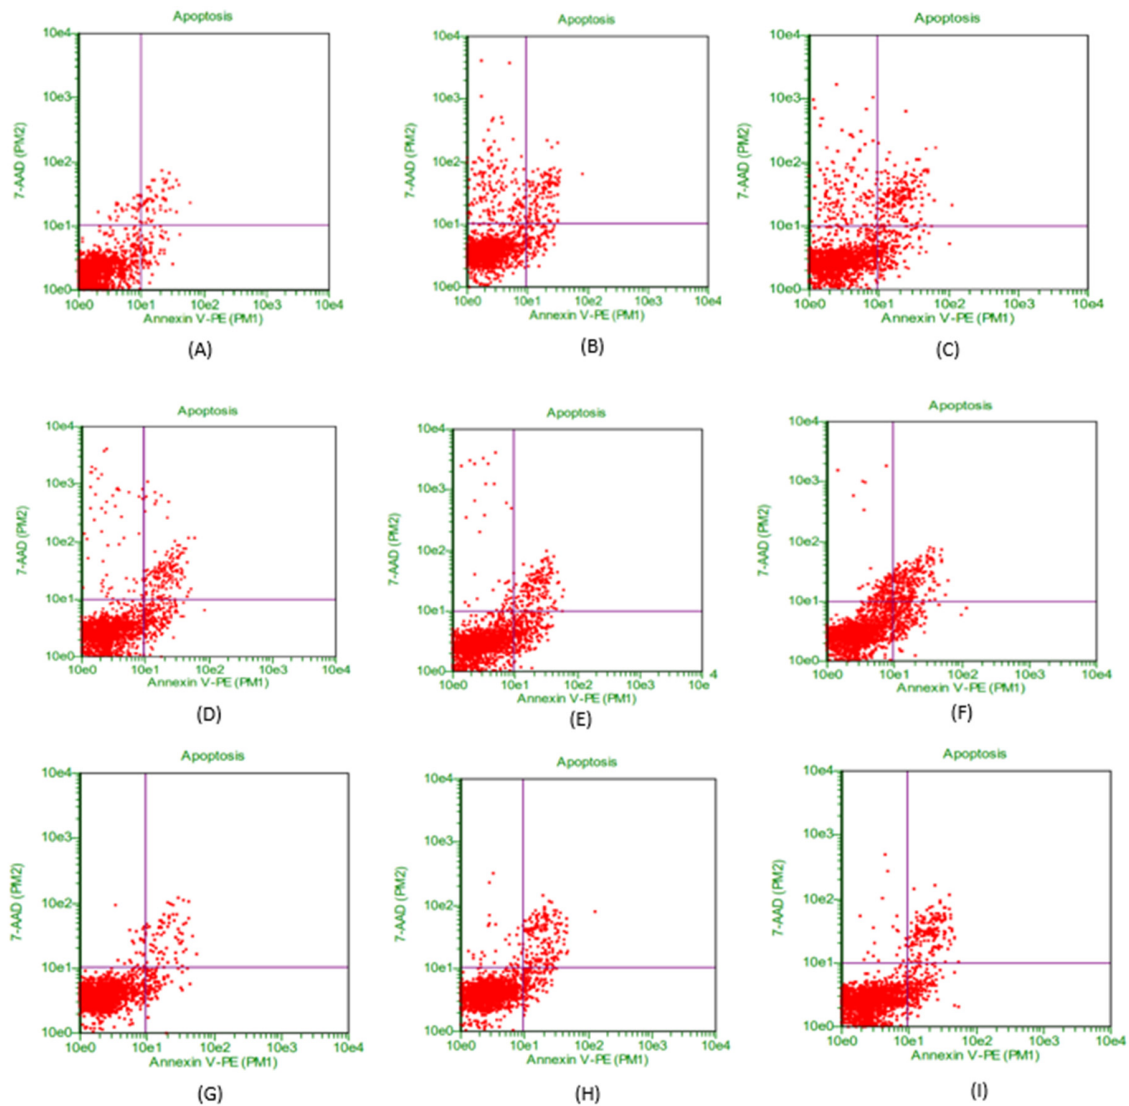

**Fig S6. Flow cytometry profiles of non-illuminated cells.** Colo205 cells preincubated with 5  $\mu$ M of the PSs for 24 h and kept in the dark. The readings were taken after 24 h. **Control** (A), **Ru<sub>4a</sub>** (B), **Ru<sub>4b</sub>** (C), **Ru<sub>2a</sub>** (D), **Ru<sub>2b</sub>** (E), **Zn-Ru<sub>4a</sub>** (F), **Zn-Ru<sub>4b</sub>** (G), **Zn-Ru<sub>2a</sub>** (H), **Zn-Ru<sub>2b</sub>** (I). The lower left quadrant represents viable cells, the lower right quadrant represents early apoptotic cells, the upper right quadrant represents late apoptotic cells, and the upper left quadrant represents dead necrotic cells. Results of one representative experiment are shown.
